# Supplementary material for: Importance of the synergistic effects between cobalt sulfate and tetrahydrofuran for selective production of 5-hydroxymethylfurfural from carbohydrates
Source: Royal Society of Chemistry journal article supplement (doi:10.1039/d0cy00225a), 2020-01-01
Supplement: d0cy00225a1.pdf [file d0cy00225a1.pdf]

## **Supporting information**

### **Importance of the synergistic effects between cobalt sulfate and tetrahydrofuran for selective production of 5-hydroxymethylfurfural from carbohydrates**

Kai Sun<sup>a</sup>, Yuewen Shao<sup>a</sup>, Qingyin Li<sup>a</sup>, Lijun Zhang<sup>a</sup>, Zhengmao Ye<sup>a</sup>, Dehua Dong<sup>a</sup>, Shu Zhang<sup>b</sup>, Yi Wang<sup>c</sup>,

Xueli Li<sup>\*d</sup>, Xun Hu<sup>\*a</sup>

**Table S1** Yields of HMF from fructose with different loading in THF with CoSO<sub>4</sub>·7H<sub>2</sub>O<sup>a</sup>

| Entry | Fructose (g) | CoSO <sub>4</sub> ·7H <sub>2</sub> O (g) | Yield (%) |      |
|-------|--------------|------------------------------------------|-----------|------|
|       |              |                                          | LA        | HMF  |
| 1     | 0.02         | 0.62                                     | 0         | 56.9 |
| 2     | 0.04         | 0.62                                     | 0         | 88.0 |
| 3     | 0.1          | 0.62                                     | 0         | 76.8 |
| 4     | 0.2          | 0.62                                     | 6.5       | 75.3 |
| 5     | 0.4          | 0.62                                     | 8.2       | 64.6 |
| 6     | 0.6          | 0.62                                     | 9.6       | 54.7 |
| 7     | 0.4          | 0                                        | 8.4       | 3.7  |

<sup>a</sup>Reaction conditions: THF: 3.6 g, T = 170°C, reaction time: 2 h, N<sub>2</sub>: 3 MPa. All the conversions were 100%.

**Table S2** Conversion of fructose or glucose over  $\text{CoSO}_4 \cdot 7\text{H}_2\text{O}$  in  $\text{H}_2\text{O}/\text{THF}^{\text{a}}$ 

| Entry | Sugar    | Catalyst <sup>b</sup>                     | $\text{H}_2\text{O}$<br>(wt%) <sup>c</sup> | Yield (%) |      |
|-------|----------|-------------------------------------------|--------------------------------------------|-----------|------|
|       |          |                                           |                                            | LA        | HMF  |
| 1     | Glucose  | -                                         | 0                                          | 0         | 0    |
| 2     | Glucose  | $\text{CoSO}_4$                           | 0                                          | 0         | 4.6  |
| 3     | Glucose  | $\text{CoSO}_4 \cdot 7\text{H}_2\text{O}$ | 10                                         | 0         | 7.7  |
| 4     | Glucose  | $\text{CoSO}_4 \cdot 7\text{H}_2\text{O}$ | 20                                         | 0         | 15.3 |
| 5     | Glucose  | $\text{CoSO}_4 \cdot 7\text{H}_2\text{O}$ | 30                                         | 0         | 27.2 |
| 6     | Glucose  | $\text{CoSO}_4 \cdot 7\text{H}_2\text{O}$ | 50                                         | 0         | 34.8 |
| 7     | Glucose  | $\text{CoSO}_4 \cdot 7\text{H}_2\text{O}$ | 70                                         | 8.7       | 11.7 |
| 8     | Fructose | -                                         | 0                                          | 0         | 3.1  |
| 9     | Fructose | $\text{CoSO}_4$                           | 0                                          | 0         | 25.7 |
| 10    | Fructose | $\text{CoSO}_4 \cdot 7\text{H}_2\text{O}$ | 10                                         | 0         | 44.1 |
| 11    | Fructose | $\text{CoSO}_4 \cdot 7\text{H}_2\text{O}$ | 20                                         | 0         | 41.2 |
| 12    | Fructose | $\text{CoSO}_4 \cdot 7\text{H}_2\text{O}$ | 30                                         | 0         | 29.6 |
| 13    | Fructose | $\text{CoSO}_4 \cdot 7\text{H}_2\text{O}$ | 50                                         | 0         | 25.4 |
| 14    | Fructose | $\text{CoSO}_4 \cdot 7\text{H}_2\text{O}$ | 70                                         | 0         | 9.2  |

<sup>a</sup>Reaction conditions: sugar: 0.04 g, solvents (THF- $\text{H}_2\text{O}$ ): 3.60 g,  $T = 170^\circ\text{C}$ , reaction time: 2 h,  $\text{N}_2$ : 3 MPa. All the conversions were 100%.

<sup>b</sup>The mole number of catalysts was 1.5 times that of the sugar.

<sup>c</sup>The mass fraction of water in THF- $\text{H}_2\text{O}$

**Table S3** The conversion of inulin with  $\text{CoSO}_4 \cdot 7\text{H}_2\text{O}$  in THF<sup>a</sup>

| Entry | Reaction temperature (°C) | The amount of $\text{CoSO}_4 \cdot 7\text{H}_2\text{O}$ (g) | Yield of HMF (%) |
|-------|---------------------------|-------------------------------------------------------------|------------------|
| 1     | 170                       | 0                                                           | 2.7              |
| 2     | 170                       | 0.01                                                        | 4.0              |
| 3     | 170                       | 0.02                                                        | 2.3              |
| 4     | 170                       | 0.05                                                        | 11.9             |
| 5     | 170                       | 0.1                                                         | 7.2              |
| 6     | 170                       | 0.2                                                         | 26.9             |
| 7     | 170                       | 0.5                                                         | 28.4             |
| 8     | 200                       | 0                                                           | 5.6              |
| 9     | 200                       | 0.01                                                        | 17.1             |
| 10    | 200                       | 0.02                                                        | 13.1             |
| 11    | 200                       | 0.05                                                        | 10.8             |
| 12    | 200                       | 0.1                                                         | 31.5             |
| 13    | 200                       | 0.2                                                         | 34.1             |
| 14    | 200                       | 0.5                                                         | 40.1             |
| 15    | 220                       | 0                                                           | 13.6             |
| 16    | 220                       | 0.01                                                        | 8.9              |
| 17    | 220                       | 0.02                                                        | 15.1             |
| 18    | 220                       | 0.05                                                        | 15.1             |
| 19    | 220                       | 0.1                                                         | 4.6              |
| 20    | 220                       | 0.2                                                         | 18.1             |
| 21    | 220                       | 0.5                                                         | 16.4             |

<sup>a</sup>Reaction conditions: inulin: 0.05 g, THF: 5 g, reaction time = 6 h,  $N_2$  = 3 MPa. All the conversions were 100%.

**Table S4** The conversion of cellulose with  $\text{CoSO}_4 \cdot 7\text{H}_2\text{O}$  in THF<sup>a</sup>

| Entry | Reaction temperature<br>(°C) | The amount of<br>$\text{CoSO}_4 \cdot 7\text{H}_2\text{O}$ (g) | Yield of HMF<br>(%) |
|-------|------------------------------|----------------------------------------------------------------|---------------------|
| 1     | 200                          | 0                                                              | 0                   |
| 2     | 200                          | 0.01                                                           | 2.9                 |
| 3     | 200                          | 0.02                                                           | 7.1                 |
| 4     | 200                          | 0.05                                                           | 15.4                |
| 5     | 200                          | 0.1                                                            | 22.1                |
| 6     | 200                          | 0.2                                                            | 25.0                |
| 7     | 200                          | 0.5                                                            | 28.1                |
| 8     | 200                          | 1                                                              | 32.5                |
| 9     | 220                          | 0                                                              | 0                   |
| 10    | 220                          | 0.01                                                           | 15.0                |
| 11    | 220                          | 0.02                                                           | 7.6                 |
| 12    | 220                          | 0.05                                                           | 18.4                |
| 13    | 220                          | 0.1                                                            | 19.7                |
| 14    | 220                          | 0.2                                                            | 26.7                |
| 15    | 220                          | 0.5                                                            | 27.4                |
| 16    | 220                          | 1                                                              | 35.3                |
| 17    | 240                          | 0                                                              | 0                   |
| 18    | 240                          | 0.01                                                           | 3.8                 |
| 19    | 240                          | 0.02                                                           | 9.9                 |
| 20    | 240                          | 0.05                                                           | 20.5                |
| 21    | 240                          | 0.1                                                            | 15.0                |
| 22    | 240                          | 0.2                                                            | 19.7                |
| 23    | 240                          | 0.5                                                            | 21.0                |
| 24    | 240                          | 1                                                              | 20.8                |

<sup>a</sup>Reaction conditions: cellulose: 0.05 g, THF: 5 g, reaction time = 6 h,  $\text{N}_2$  = 3 MPa. All the conversions were 100%.

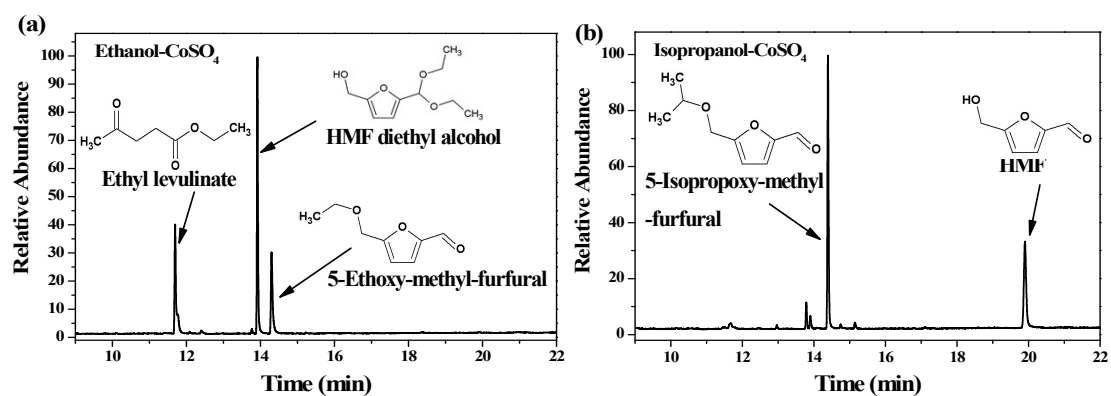

**Figure S1** The chromatogram of the products from the conversion of HMF with  $\text{CoSO}_4 \cdot \text{H}_2\text{O}$  in (a) ethanol and (b) isopropanol. The products were identified with a standard library (NIST MS Search 2014).

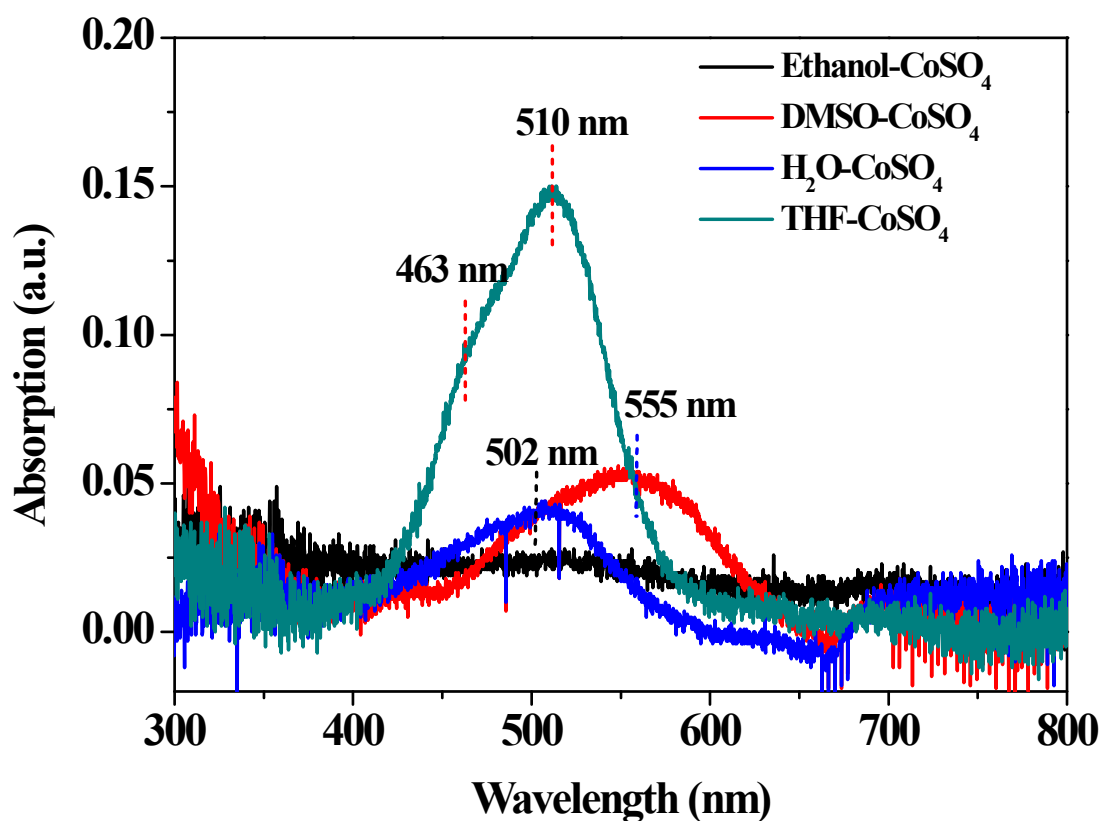

**Figure S2** UV-Vis spectra of  $\text{H}_2\text{O}$ , DMSO and THF dissolved  $\text{CoSO}_4 \cdot 7\text{H}_2\text{O}$ . Test condition:  $\text{CoSO}_4 \cdot 7\text{H}_2\text{O}$  was dissolved in water or DMSO to form a homogeneous solution with a concentration of 20 ppm, respectively.  $\text{CoSO}_4 \cdot 7\text{H}_2\text{O}$  and 3-5 drops of water seriously weighed was well mixed to make sure the appearance of a uniform solution which was diluted to 20 ppm. The prepared solution was tested by UV-Vis spectrophotometer at once.

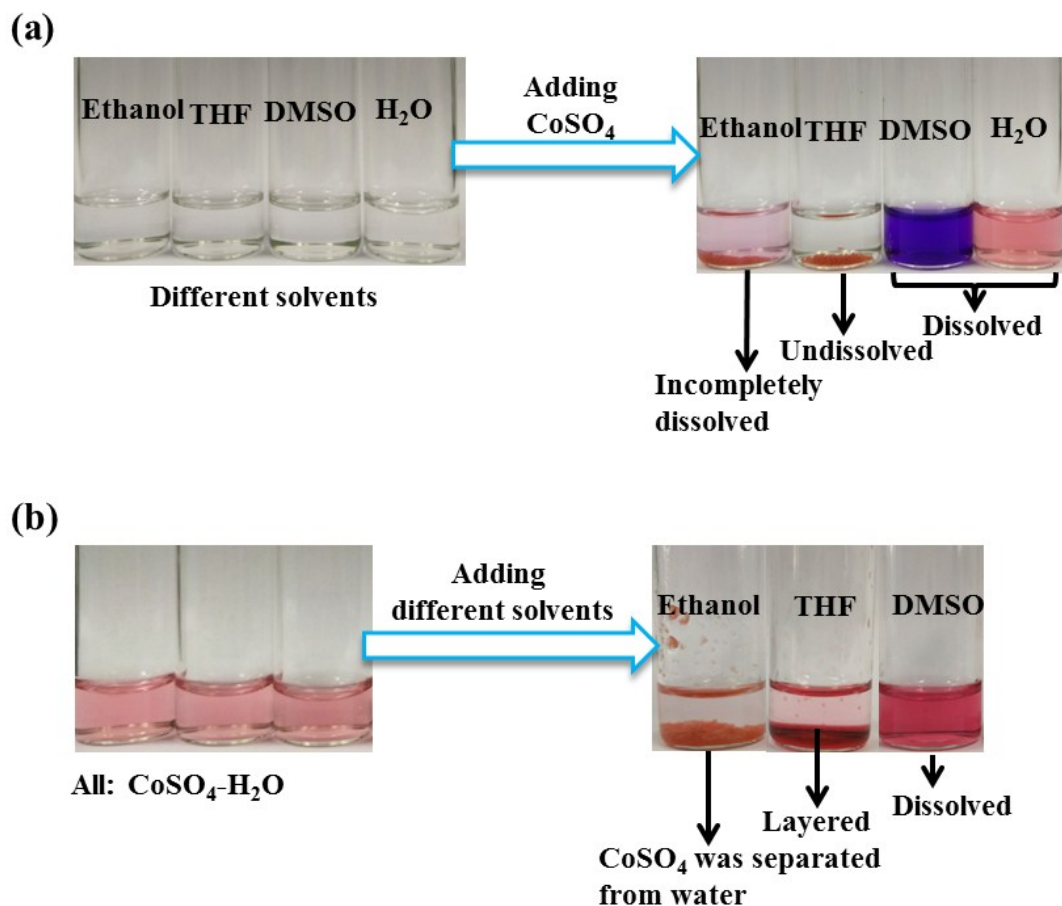

**Figure S3** The solubility test about  $\text{CoSO}_4 \cdot 7\text{H}_2\text{O}$  in ethanol, DMSO,  $\text{H}_2\text{O}$  or THF. The process of test: (a)  $\text{CoSO}_4$  was added into ethanol, DMSO,  $\text{H}_2\text{O}$  or THF; (b) 3 set of  $\text{CoSO}_4$  aqueous solution with the same concentration of 0.015 g/mL was added 0.5 mL of ethanol, DMSO and THF, respectively. The change of solution was observed with eyes.
